# Supplementary material for: Amperometric bienzymatic biosensor for l-lactate analysis in wine and beer samples
Source: Royal Society of Chemistry journal article supplement (doi:10.1039/c2an35227c), 2012-01-01
Supplement: c2an35227c.pdf [file c2an35227c.pdf]

## Supplementary information

### Amperometric bienzymatic biosensor for L-lactate analysis in wine and beer samples

Sandra Pérez\*, Esteve Fàbregas

Sensors and Biosensors Group, Department of Chemistry, Universitat Autònoma de Barcelona, Edifici Cn, 08193 Bellaterra, Barcelona, SPAIN

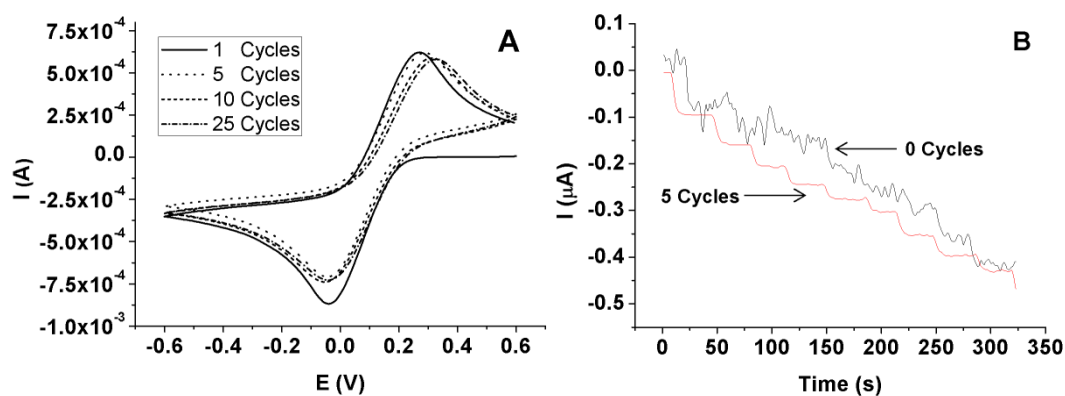

Figure S1. (A) Activation of Dropsens carbon electrodes. Different voltammetric cycles in 0.05 M  $K_3[Fe(CN)_6]$  were performed without membrane to improve the stability of the signal when carrying the amperometric measurements. (B) Chronoamperometric measurements corresponding to additions of  $[Fe(CN)_6]^{3-}$  with Dropsens electrode before (solid line) and after (dashed line) the stabilization.

\* E-mail: [Sandra.perez@uab.cat](mailto:Sandra.perez@uab.cat); tel: +34 93 5812118; fax: +34 93 5812379
